# Supplementary material for: Fabrication of 3D Ni/NiO/MoS2/rGO foam for enhancing sensing performance
Source: Royal Society of Chemistry journal article supplement (doi:10.1039/d0nj05962e), 2021-01-01
Supplement: d0nj05962e1.pdf [file d0nj05962e1.pdf]

### Figure Captions

**Fig. S1.** The work function ( $W$ ) determined by the difference between the photo energy and the binding energy of the secondary cutoff edge. ( $W = 21.2 \text{ eV} - 16.6 \text{ eV} = 4.6 \text{ eV}$ )

**Fig. S2.** (a) Typical C-V curve of 3D Ni/NiO/MoS<sub>2</sub> foam with continuous addition of DA under continuous agitation. (b) Typical C-V curve of rGO with continuous addition of DA under continuous agitation.

The scan range is from -0.6V to 0.6V at a rate of  $100 \text{ mV}\cdot\text{S}^{-1}$  and the number of sweep segments is 4.

**Fig. S3.** (a) The electrochemical response of the single MoS<sub>2</sub> to 1 mM DA, UA and AA in 0.01 M PBS at pH = 7.4. (b) The electrochemical response of the single rGO to 1 mM DA, UA and AA in 0.01 M PBS at pH = 7.4. The scan range is from -0.6V to 0.6V at a rate of  $100 \text{ mV}\cdot\text{S}^{-1}$  and the number of sweep segments is 4.

**Fig. S4.** CV curves of Ni/NiO (a), Ni/NiO/MoS<sub>2</sub> (b), and Ni/NiO/MoS<sub>2</sub>/rGO (c) against different scan rates.

**Annotation:** The the actual electrochemically active surface area was performed at room temperature in 0.1 M PBS (pH 7.4) using a standard three-electrode cell, where a Ag/AgCl electrode served as the reference electrode, a Pt wire served as the counter electrode, and the Ni/NiO or Ni/NiO/MoS<sub>2</sub> or Ni/NiO/MoS<sub>2</sub>/rGO (typically  $1\times 1.5 \text{ cm}^2$ ) covered with products served as the working electrode. All potentials were measured against the Ag/AgCl electrode and converted to the reversible hydrogen electrode (RHE) reference scale using  $ERHE \text{ (V)} = E_{\text{Ag/AgCl}} + 0.197 + 0.059 \times \text{pH}$ . Cyclic voltammetry was measured from 0 to 0.1 V vs RHE at different scan rates from  $20 \text{ mV}\cdot\text{s}^{-1}$  to  $200 \text{ mV}\cdot\text{s}^{-1}$ .

**Fig. S5.** Nyquist plots of EIS of the Ni/NiO (a), the Ni/NiO/MoS<sub>2</sub> (b) and the Ni/NiO/MoS<sub>2</sub>/rGO (c) with the addition of  $3 \mu\text{M}$  DA in the frequency ranges from 0.01 Hz to 100 KHz.

**Fig. S6.** Reproducibility of 3D Ni/NiO/MoS<sub>2</sub>/rGO foam after 100 successive cyclic voltammograms measurement for 1 mM DA.

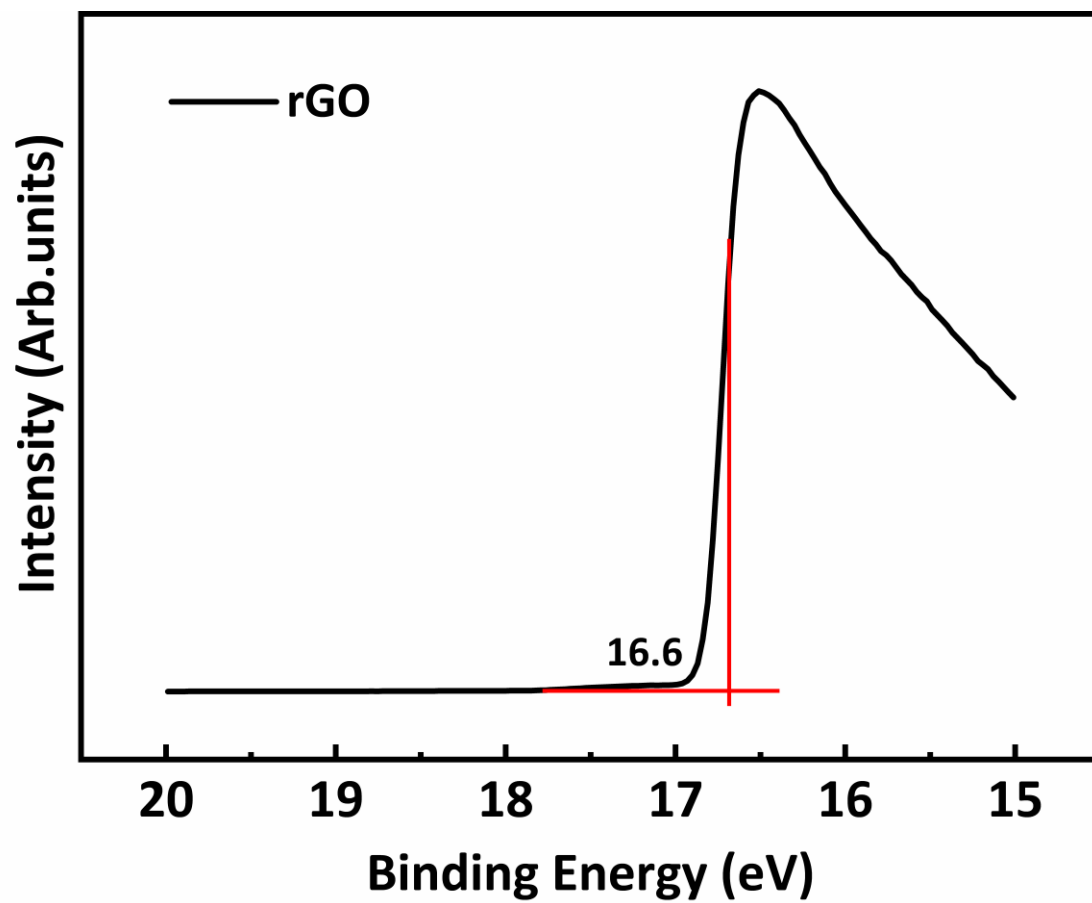

Fig.S1

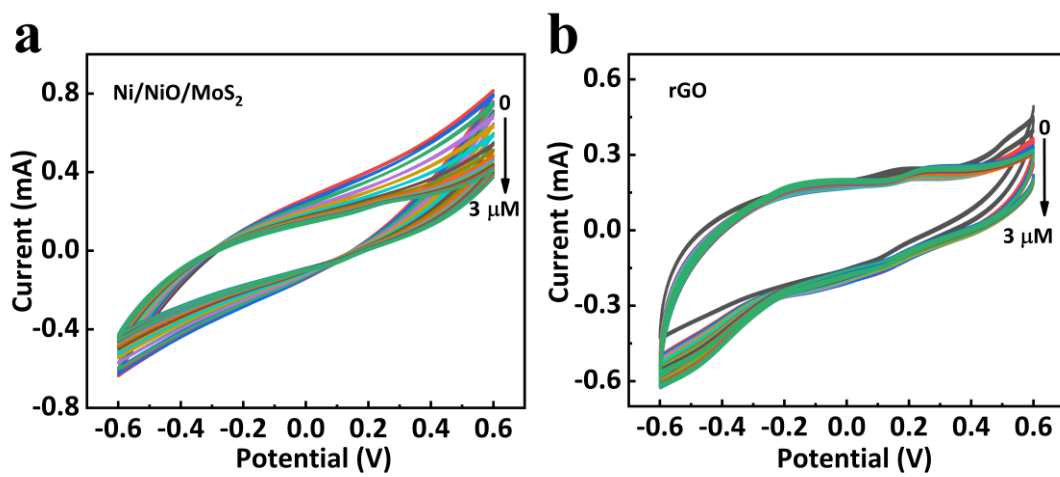

Fig.S2

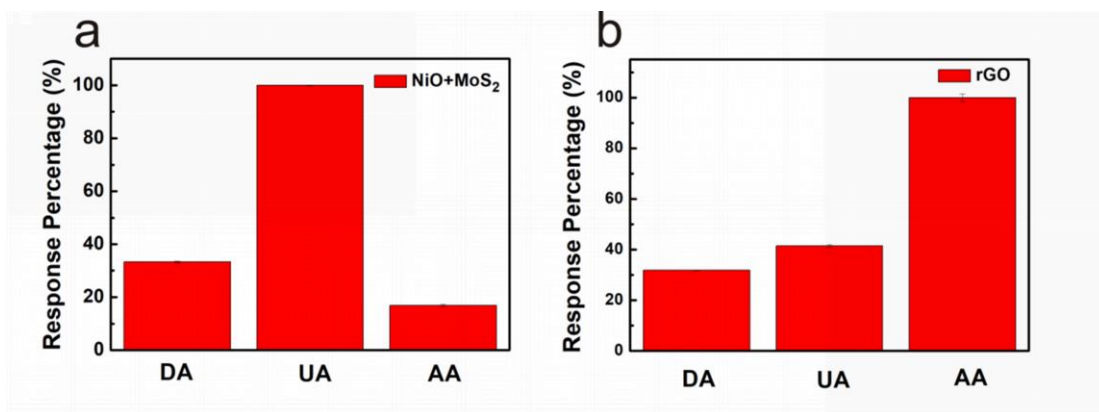

Fig.S3

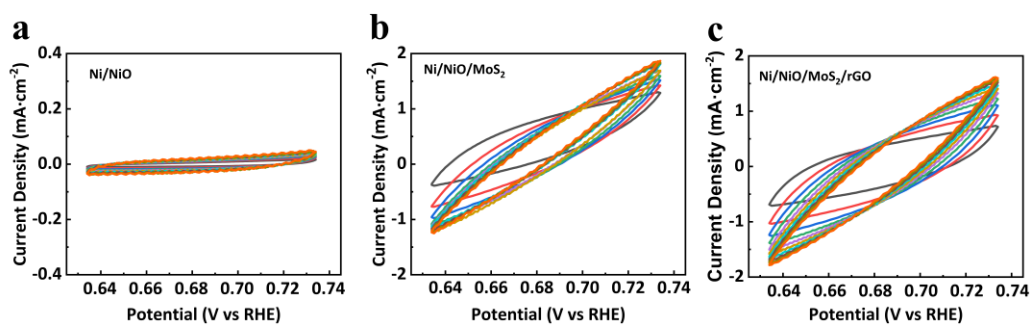

Fig.S4

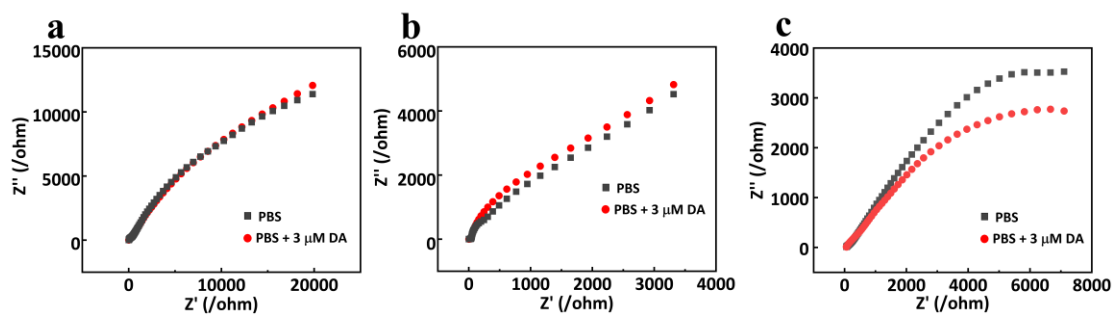

Fig.S5

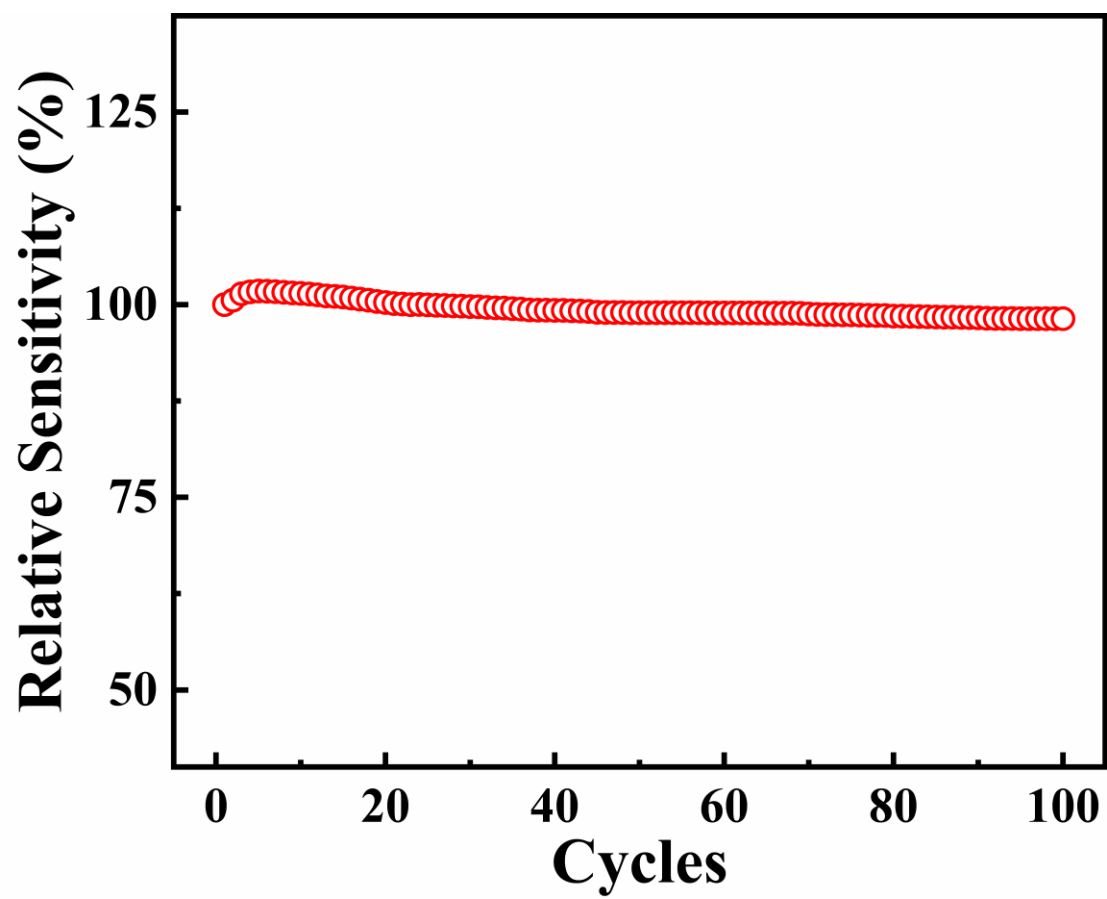

Fig. S6
